# Supplementary material for: Mixed Connective Tissue Disease as Different Entity: Global Methylation Aspect
Source: MDPI journal article supplement (doi:10.3390/ijms242015495), 2023-10-23
Supplement: s1 [file s1]

## Supplementary Material

**Table 1S.** MCTD activity (MCTD-AI) scale.

| <b>Point value</b> | <b>Clinical manifestation</b> |
|--------------------|-------------------------------|
| <b>8</b>           | Pulmonary hypertension        |
| <b>8</b>           | Pulmonary involvement         |
| <b>8</b>           | Vasculitis                    |
| <b>4</b>           | Myositis                      |
| <b>4</b>           | Esophageal involvement        |
| <b>4</b>           | Neuropathy                    |
| <b>4</b>           | Kidney involvement            |
| <b>2</b>           | Puffy hands                   |
| <b>2</b>           | Serositis                     |
| <b>2</b>           | Skin symptoms                 |
| <b>2</b>           | Polyarthritis                 |
| <b>1</b>           | ↑ ESR/CRP                     |
| <b>1</b>           | ↑gamma globulins              |
| <b>1</b>           | ↓ Hb                          |
| <b>1</b>           | Platelets<br>↓leucocytes      |

Table 2S. MCTD damage (MCTD-DI) scale.

| Type of symptoms          | Clinical manifestation                                                                   |
|---------------------------|------------------------------------------------------------------------------------------|
| Kidney involvement        | Proteinuria > 3,5g/24h                                                                   |
|                           | End-stage renal disease                                                                  |
|                           | GFR < 50 %                                                                               |
| Cardiovascular symptoms   | Cardiomyopathy / ventricular dysfunction                                                 |
|                           | Hypertension (HA) treated > 6 months                                                     |
|                           | Coronary artery disease or coronary artery bypass                                        |
|                           | Pericarditis > 6 months / pericardiectomy                                                |
|                           | Valve dysfunction                                                                        |
|                           | Myocardial infarction                                                                    |
| Eye symptoms              | Cataract                                                                                 |
|                           | Changes in the retina or optic atrophy                                                   |
| Neuropsychiatric symptoms | Stroke                                                                                   |
|                           | Neuropathy of the cranial or peripheral nerves (excluding the optic nerve)               |
|                           | Cognitive impairment                                                                     |
|                           | Transverse myelitis                                                                      |
|                           | Seizures requiring treatment > 6 months                                                  |
| Lung involvement          | ↓ DLCO                                                                                   |
|                           | ↓ FEV1                                                                                   |
|                           | “Shrinking lung” syndrome                                                                |
|                           | Pulmonary fibrosis (confirmed by X-ray / CT / biopsy)                                    |
|                           | Pulmonary hypertension (> 10 % from the upper limit of normal)                           |
| Gastrointestinal symptom  | Chronic peritonitis                                                                      |
|                           | Infarction / intestine or other abdominal organ / resection of the stomach               |
|                           | Impaired gastrointestinal motility, diarrhea, abdominal pain, or constipation            |
|                           | Dysfunction – esophageal dysfunction documented by X-ray                                 |
| Skin symptoms             | Skin ulcers (excluding thrombosis) for at least 6 months                                 |
|                           | Skin calcification / subcutaneous tissue / soft tissue                                   |
|                           | Extensive scarring or skin atrophy (except for scalp and fingertips)                     |
|                           | Fat loss (local / diffuse)                                                               |
|                           | Alopecia with scarring                                                                   |
|                           | Deforming or erosive arthritis                                                           |
|                           | Osteoporosis with peripheral / compression fractures of the vertebrae (excluding aseptic |

|                          |                                                                                                                 |
|--------------------------|-----------------------------------------------------------------------------------------------------------------|
| Musculoskeletal symptoms | necrosis)                                                                                                       |
|                          | Muscle atrophy (reduction of muscle mass assessed by clinical examination)                                      |
|                          | Muscle weakness not resulting from active muscle disease                                                        |
|                          | Non-fracture osteoporosis requiring anti-osteoporotic treatment (except calcium and vitamin D3 supplementation) |
|                          | Aseptic necrosis                                                                                                |
| Endocrine Disorder       | Hypertrichosis                                                                                                  |
|                          | Irregular periods                                                                                               |
|                          | Diabetes                                                                                                        |
|                          | Growth retardation (children)                                                                                   |
|                          | Delayed development of secondary sex characteristics (children)                                                 |
|                          | Sexual dysfunction (adults)                                                                                     |
|                          | Infertility (adults)                                                                                            |
|                          | Primary or secondary amenorrhea                                                                                 |
| Infections               | Multiple infections (>3 infections at the same / different location within 6 months)                            |
|                          | Chronic infections                                                                                              |
| Tumor                    | Cancer (specify type, stage)                                                                                    |
| Others                   | Death (cause, date)                                                                                             |
